# Supplementary material for: Influence of periodic heartbeat reversal and abdominal movements on hemocoelic and tracheal pressure in resting blowfliesCalliphora vicina
Source: Oxford University Press journal article supplement (doi:10.1242/jeb.063743), 2011-12-21
Supplement: jeb063743tables1.pdf [file jeb063743tables1.pdf]

Table S1. Heartbeat frequency and duration of sequences, pulse periods and pauses, based on thermistor and electrophysiological recordings

| Specimen ID/Year                | $T_a$ (°C) | Sequences |                       | Duration of pulse periods and pauses (s) |           |           |           | Pulse rate (Hz) |          |
|---------------------------------|------------|-----------|-----------------------|------------------------------------------|-----------|-----------|-----------|-----------------|----------|
|                                 |            | No./min   | No. min <sup>-1</sup> | Forward                                  | Pause     | Backward  | Pause     | Forward         | Backward |
| Thermistor recordings           |            |           |                       |                                          |           |           |           |                 |          |
| M2/1994                         | 20         | 36/25     | 1.44                  | 25.2±2.7                                 | 2.9±1.4   | 12.6±2.9  | 1.0±0.4   | 2.6±0.3         | 3.8±0.2  |
| F1/1995                         | 20         | 32/10     | 3.2                   | 10.5±1.6                                 | 0.6±0.5   | 6.3±1.4   | 1.4±1.1   | 3.4±0.1         | 5.1±0.5  |
| F2/1995                         | 20         | 31/8      | 3.87                  | 7.6±2.3                                  | 0.5±0.16  | 5.1±0.6   | 0.9±0.4   | 3.8±0.5         | 4.8±1.3  |
| F3/1995                         | 20         | 32/9      | 3.5                   | 10.5±1.5                                 | 0.5±0.05  | 4.8±0.2   | 1.0±0.5   | 3.4±0.2         | 4.8±0.2  |
| F4/1995                         | 20         | 30/11     | 2.72                  | 12.6±2.1                                 | 1.0±0.3   | 6.2±0.7   | 2.2±0.7   | 3.0±0.2         | 5.1±0.3  |
| F2/2000                         | 20.5       | 33/19     | 1.73                  | 24.3±4.9                                 | 2.0±0.65  | 5.7±2.5   | 2.1±0.4   | 3.2±0.3         | 3.7±0.1  |
| M2/2007                         | 21         | 31/15     | 2.06                  | 20.0±7.1                                 | 0.6±0.3   | 8.5±6.3   | 0.2±0.1   | 3.2±0.3         | 5.1±0.2  |
| M8/2007                         | 20.3       | 90/32     | 2.81                  | 17.2±3.6                                 | 0.3±0.1   | 3.5±0.6   | 0.2±0.1   | 4.2±0.2         | 5.2±1.1  |
| F9/2007                         | 21.8       | 32/31     | 1.03                  | 37.3±7.7                                 | 1.5±1.28  | 18.1±9.8  | 1.0±0.3   | 3.3±0.2         | 5.3±0.1  |
| F1/2008                         | 21.7       | 32/46     | 0.69                  | 74.0±21                                  | 0.1±0.05  | 10.6±7.0  | 0.8±0.3   | 3.9±0.1         | 5.1±0.3  |
| F2/2008                         | 21.7       | 32/12     | 2.66                  | 17.0±5.8                                 | 0.6±0.32  | 3.4±0.9   | 0.4±0.2   | 4.0±0.5         | 5.4±0.3  |
| F3/2008                         | 21         | 31/13     | 2.38                  | 19.3±10                                  | 0.3±0.1   | 4.2±1.3   | 0.5±0.1   | 3.7±0.2         | 5.4±0.1  |
| Electrophysiological recordings |            |           |                       |                                          |           |           |           |                 |          |
| F10/2008                        | 21.5       | 32/15     | 2.13                  | 19.0±6.5                                 | 0.2±0.16  | 7.8±6.1   | 0.2±0.1   | 3.7±0.3         | 4.8±0.1  |
| M15/2009                        | 22         | 35/25     | 1.45                  | 25.7±5.1                                 | 0.6±0.32  | 14.6±5.9  | 0.8±0.2   | 2.5±0.2         | 5.0±0.3  |
| M2/2009                         | 22         | 10/4      | 2.5                   | 9.37±2.2                                 | 0.5±0.46  | 6.4±3.32  | 0.9±0.4   | 4.0±0.46        | 5.2±0.55 |
| M3/2009                         | 21.5       | 39/33     | 1.18                  | 33.0±13.3                                | 1.1±0.37  | 13.7±4.16 | 0.6±0.17  | 3.2±0.5         | 4.7±0.5  |
| M4/2009                         | 22         | 5/7       | 0.7                   | 59.4±14.9                                | 1.3±0.49  | 21.5±6.9  | 1.2±0.44  | 2.5±0.2         | 4.2±0.83 |
| F5/2009                         | 22         | 20/7      | 2.8                   | 16.3±2.8                                 | 0.3±0.14  | 4.9±1.79  | 0.13±0.08 | 2.6±0.4         | 4.0±0.46 |
| F23/2009                        | 22.5       | 32/12     | 2.6                   | 13.1±2.5                                 | 1.7±0.69  | 5.0±0.64  | 0.59±0.10 | 1.9±0.25        | 5.1±0.21 |
| F13/2009                        | 21         | 5/4       | 1.25                  | 31.3±9.0                                 | 0.36±0.13 | 10.9±5.87 | 1.0±0.37  | 2.5±0.67        | 4.4±0.39 |
| F12/2009                        | 21         | 35/16     | 2.18                  | 19.6±8.68                                | 0.52±0.34 | 8.0±3.81  | 0.7±0.22  | 3.2±0.33        | 5.0±0.33 |
| F11/2009                        | 21         | 24/18     | 1.33                  | 25.3±6.81                                | 1.9±1.28  | 15.1±5.1  | 1.3±0.51  | 2.2±0.14        | 4.3±0.64 |
| F10/2009                        | 22         | 33/11     | 3                     | 12.3±3.82                                | 0.8±0.52  | 4.5±0.87  | 0.5±0.27  | 3.1±0.34        | 4.1±0.33 |
| F9/2009                         | 21         | 32/45     | 0.7                   | 36.9±13.14                               | 1.4±1.07  | 8.0±4.16  | 0.9±0.58  | 2.9±13.14       | 5.2±0.28 |
| F6/2009                         | 21.5       | 20/9      | 2.2                   | 16.7±6.85                                | 0.4±0.37  | 8.3±6.39  | 1.1±0.45  | 2.6±0.23        | 4.6±0.32 |
| F8/2009                         | 21         | 20/10     | 2                     | 22.6±3.11                                | 1.1±0.92  | 5.9±0.34  | 0.7±0.22  | 1.5±0.13        | 3.7±0.17 |
| Mean (N=26)                     | 21.3       | 30.6/17.3 | 2.5±0.35              | 23.6±0.99                                | 0.9±0.02  | 8.5±1.55  | 0.9±0.15  | 3.0±0.45        | 4.7±0.21 |

F, female; M, male;  $T_a$ , ambient temperature.Means are presented  $\pm$ s.d.
