# Supplementary material for: Influence of periodic heartbeat reversal and abdominal movements on hemocoelic and tracheal pressure in resting blowfliesCalliphora vicina
Source: Oxford University Press journal article supplement (doi:10.1242/jeb.063743), 2011-12-21
Supplement: jeb063743tables2.pdf [file jeb063743tables2.pdf]

Table S2. Hemolymph pressure in the mesoscutal hemocoel

| Specimen ID/Date  | Time (h) | $T_a$ (°C) | Sequences |                       | Hemolymph pressure (Pa)     |                             |                         | Pulse amplitude ( $\Delta$ Pa) |         |
|-------------------|----------|------------|-----------|-----------------------|-----------------------------|-----------------------------|-------------------------|--------------------------------|---------|
|                   |          |            | No./min   | No. min <sup>-1</sup> | Mean upper value during PPT | Mean lower value during NPT | Lowest value during NPT | PPT                            | NPT     |
| F1/30.09.07       | 10:00    | 20         | 86/46     | 1.87                  | -41±10                      | -96±20                      | -122                    | 3.5±0.5                        | ≤1      |
| F1/01.10.07       | 08:00    | 20         | 147/66    | 2.22                  | -32±2                       | -107±14                     | -230                    | 4±1                            | ≤1      |
| M2/05.10.07       | 09:00    | 20         | 23/36     | 0.63                  | -50±13                      | -420±50                     | -535                    | 10±2                           | 2±1     |
| M2/05.10.07       | 10:00    | 20         | 30/44     | 0.68                  | -32±11                      | -357±47                     | -485                    | 8±2                            | ≤1      |
| M2/05.10.07       | 13:00    | 20         | 166/114   | 1.45                  | -14±6                       | -472±99                     | -774                    | 6±2                            | ≤1      |
| M2/05.10.07       | 20:00    | 20         | 33/46     | 0.71                  | 0±4                         | -405±60                     | -590                    | 6±2                            | 6±2     |
| F3/06.10.07       | 16:00    | 21         | 149/51    | 2.92                  | -1±2                        | -78±33                      | -120                    | 28±10                          | 10±6    |
| F3/07.10.07       | 06:00    | 21         | 192/155   | 1.24                  | -40±12                      | -268±37                     | -425                    | 42±3                           | 11±4    |
| F3/07.10.07       | 21:00    | 21         | 55/28     | 1.96                  | -46±30                      | -286±60                     | -500                    | 60±15                          | 21±5    |
| M4/08.10.07       | 08:00    | 22         | 83/42     | 1.97                  | -38±26                      | -378±25                     | -458                    | 21±8                           | 3±0.5   |
| M4/09.10.07       | 10:00    | 23         | 34/37     | 0.92                  | -41±27                      | -461±40                     | -550                    | 7±0.5                          | 5±1     |
| F5/09.10.07       | 23:00    | 23         | 60/34     | 1.76                  | -8±4                        | -48±20                      | -54                     | 5±1                            | ≤1      |
| F5/10.10.07       | 22:00    | 23         | 45/42     | 1.07                  | -25±7                       | -205±37                     | -255                    | 8±2                            | ≤1      |
| M9/25.11.08       | 08:00    | 20         | 37/20     | 1.85                  | 0±1                         | -100±26                     | -130                    | 17±3                           | 13±2    |
| M9/25.11.08       | 20:00    | 22         | 87/66     | 1.31                  | -27±9                       | -231±42                     | -380                    | 18±6                           | 4±1     |
| F10/26.11.08      | 00:00    | 20         | 50/26     | 1.92                  | -39±13                      | -219±47                     | -249                    | 19±4                           | 19±11*  |
| F10/26.11.08      | 17:00    | 20         | 58/43     | 1.3                   | -21±5                       | -255±137                    | -750                    | 7±2                            | 2±1     |
| F10/27.11.08      | 01:00    | 21         | 84/36     | 2.33                  | -45±30                      | -257±60                     | -365                    | 8±3                            | ≤1      |
| M21/02.06.09      | 12:00    | 22         | 148/60    | 2.46                  | -20±10                      | -278±48                     | -318                    | 5±2                            | 1±0.5   |
| F23/12.06.09      | 17:00    | 23         | 170/56    | 3.03                  | -20±4                       | -86±27                      | -323                    | 12±10                          | 22±8*   |
| F26/18.06.09      | 21:00    | 22         | 81/30     | 2.7                   | -29±8                       | -78±8                       | -160                    | 4±1                            | 1±0.5   |
| Mean (N=10 flies) |          | 20-23      |           | 1.54±0.71             | -27±15                      | -242±136                    | -370±204                | 14±14                          | 4.6±5.3 |

NPT, negative pressure pulse period in the thoracic hemocoel corresponding to the backward pulse periods of the heart; PPT, positive pressure pulse period in the thoracic hemocoel corresponding to the forward pulse periods of the heart;  $T_a$ , ambient temperature.

\*High amplitudes of NPT in relation to PPT, unlike in the other data, resulting from the application of saline. These data were not considered in means and statistics.
