# Supplementary material for: Influence of periodic heartbeat reversal and abdominal movements on hemocoelic and tracheal pressure in resting blowfliesCalliphora vicina
Source: Oxford University Press journal article supplement (doi:10.1242/jeb.063743), 2011-12-21
Supplement: jeb063743tables3.pdf [file jeb063743tables3.pdf]

Table S3. Intratracheal pressure in the mesoscutellar air sac

| Specimen ID/Date  | Time (h) | $T_a$ (°C) | Sequences   |                          | Air pressure (Pa)              |                                |
|-------------------|----------|------------|-------------|--------------------------|--------------------------------|--------------------------------|
|                   |          |            | No./<br>min | No.<br>min <sup>-1</sup> | Mean upper value<br>during PPT | Mean lower value<br>during NPT |
| F2/23.11.02       | 06:00    | 21         | 36/32       | 1.12                     | 9.2±4.3                        | -8.3±6                         |
| F5/03.09.08       | 12:00    | 22         | 56/31       | 1.80                     | 10.5±5.2                       | -4.9±1.5                       |
| F6/03.09.08       | 09:00    | 22         | 34/33       | 1.03                     | 13.8±1.3                       | -9.4±2.3                       |
| F7/03.09.08       | 21:00    | 22         | 41/13       | 3.15                     | 10.5±2.6                       | -4.4±2.8                       |
| M2/28.01.09       | 20:00    | 22         | 129/44      | 2.93                     | 1.3±0.1                        | -0.45±0.05                     |
| M3/02.02.09       | 21:00    | 22         | 77/49       | 1.57                     | 0.28±0.02                      | -0.12±0.03                     |
| M4/05.02.09       | 02:00    | 22         | 67/131      | 0.51                     | 0.18±0.02                      | -0.1±0.02                      |
| F5/06.02.09       | 03:00    | 22         | 34/20       | 1.7                      | 0.42±0.03                      | -0.25±0.05                     |
| F5/07.02.09       | 12:00    | 21         | 31/11       | 2.8                      | 0.45±0.05                      | -0.2±0.04                      |
| F6/18.2.09        | 14:00    | 21         | 114/58      | 1.96                     | 0.35±0.05                      | -0.2±0.1                       |
| F6/19.2.09        | 10:00    | 22         | 32/35       | 0.91                     | 0.26±0.03                      | -0.1±0.1                       |
| F8/20.02.09       | 00:00    | 20         | 49/32       | 1.53                     | 0.2±0.02                       | -0.1±0.05                      |
| F8/21.02.09       | 04:00    | 20         | 67/130      | 0.51                     | 0.3±0.05                       | -0.2±0.03                      |
| F9/22.09.09       | 20:00    | 21         | 10/8        | 1.25                     | 19±3                           | -14±2                          |
| F10/01.03.09      | 23:00    | 21         | 27/12       | 2.25                     | 0.45±0.03                      | -0.55±0.01                     |
| F10/03.03.09      | 12:00    | 22         | 129/44      | 2.93                     | 0.23±0.02                      | -0.19±0.01                     |
| F11/08.03.09      | 00:00    | 20         | 141/91      | 1.54                     | 57±16                          | -85±26                         |
| F11/09.03.09      | 19:00    | 21         | 41/26       | 1.89                     | 1±0.05                         | -0.5±0.02                      |
| F12/12.03.09      | 08:00    | 21         | 175/55      | 3.1                      | 0.10±0.06                      | -0.05±0.04                     |
| F13/13.03.09      | 22:00    | 20         | 26/22       | 1.18                     | 27±2.8                         | -26±2.2                        |
| F13/14.03.09      | 20:00    | 20         | 25/20       | 1.25                     | 27±2                           | -12±2                          |
| F13/16.03.09      | 02:00    | 21         | 65/18       | 3.61                     | 1.1±0.3                        | -0.6±0.2                       |
| F14/20.03.09      | 12:00    | 20         | 119/33      | 3.6                      | 14±2                           | -12±4                          |
| F14/21.03.09      | 07:00    | 21         | 27/11       | 2.45                     | 20±2                           | -17±2                          |
| F14/20.3.09       | 12:00    | 22         | 50/31       | 1.6                      | 1±0.5                          | -2.2±0.2                       |
| M15/24.03.09      | 13:00    | 21         | 43/15       | 2.8                      | 13±2                           | -14±4                          |
| Mean (N=17 flies) |          | 21         |             | 1.9±0.9                  | 8.8±13                         | -8.1±17                        |

NPT, negative pressure pulse period in the thoracic hemocoel corresponding to the backward pulse periods of the heart; PPT, positive pressure pulse period in the thoracic hemocoel corresponding to the forward pulse periods of the heart;  $T_a$ , ambient temperature.
